# Supplementary material
Source: PubMed Central journal article supplement (PMC6072075)

## Design, Synthesis and Preliminary Antimicrobial Evaluation of *N*-Alkyl Chain Tethered C-5 Functionalized Bis-Isatins

Amandeep Singh<sup>a</sup>, Nisha<sup>a</sup>, Trpta Bains<sup>b</sup>, Hye Jee Hahn<sup>b</sup>, Nicole Liu<sup>c</sup>, Christina Tam<sup>d</sup>, Luisa W. Cheng<sup>d</sup>, Jong Kim<sup>d</sup>, Anjan Debnath<sup>b</sup>, Kirkwood M. Land,<sup>\*c</sup> and Vipin Kumar<sup>\*a</sup>

<sup>a</sup> Department of Chemistry, Guru Nanak Dev University, Amritsar 143005, India

<sup>b</sup> Centre for Discovery and Innovation in Parasitic Diseases, Skaggs School of Pharmacy and Pharmaceutical Sciences, University of California San Diego, La Jolla, CA 92093, USA

<sup>c</sup> Department of Biological Sciences, University of the Pacific, Stockton, CA 95211, USA

<sup>d</sup> Foodborne Toxin Detection and Prevention Research Unit, Agricultural Research Service, United States Department of Agriculture, Albany, CA 94710, USA

Scanned (<sup>1</sup>H, <sup>13</sup>C) NMR spectra for the compounds *viz.* 4a, 4e, 4f, 4m, 4n, 4u, 4v.

<sup>1</sup>H NMR of 1-[2-(2,3-dioxo-2,3-dihydro-indol-1-yl)-ethyl]-1H-indole-2,3-dione(4a)

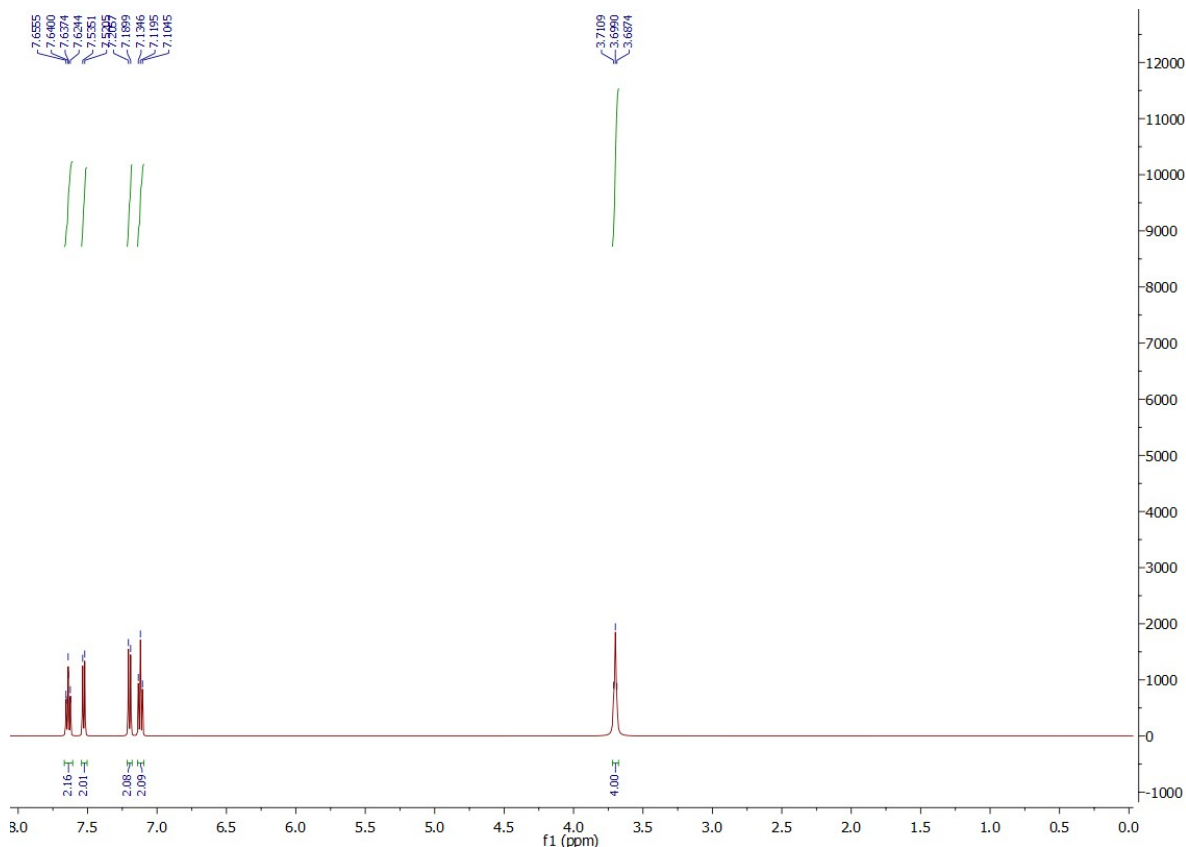

**<sup>13</sup>CNMR of 1-[2-(2,3-dioxo-2,3-dihydro-indol-1-yl)-ethyl]-1H-indole-2,3-dione(4a)**

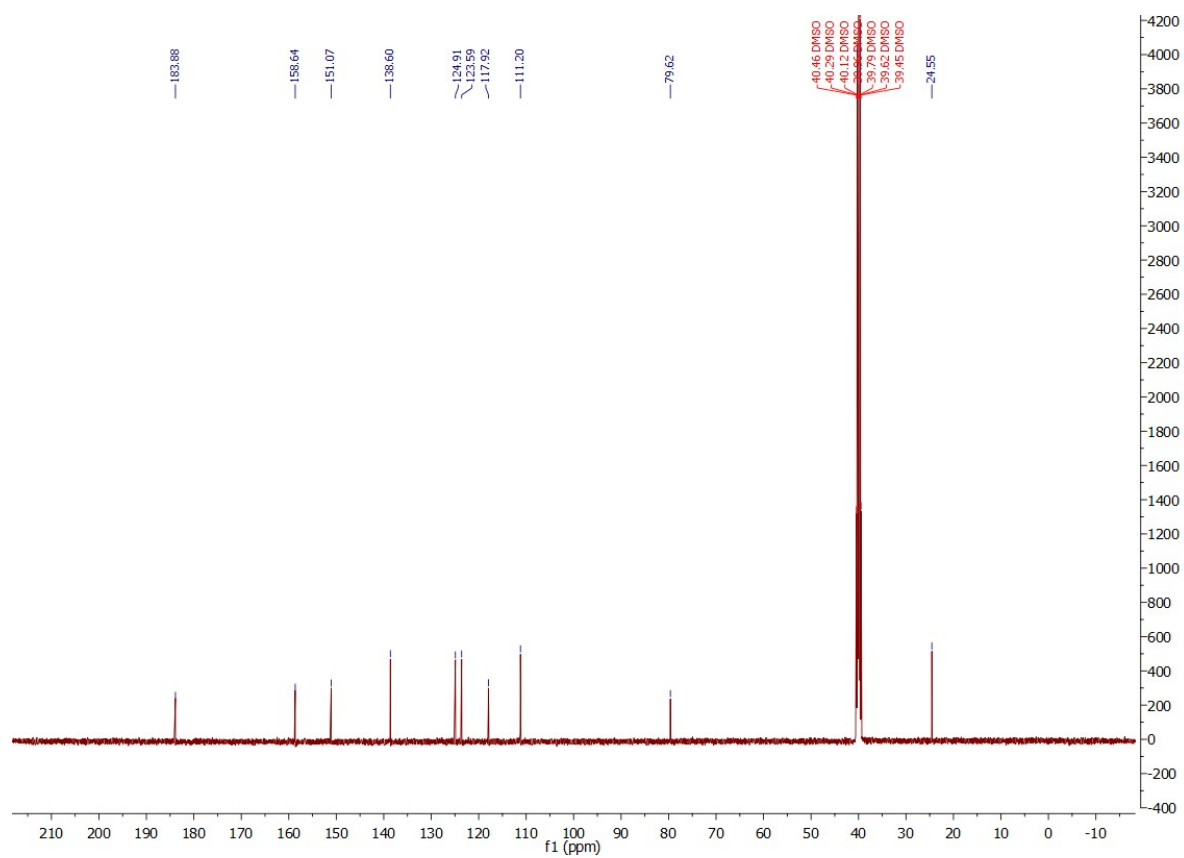

**<sup>1</sup>H NMR of 1-[6-(2,3-dioxo-2,3-dihydro-indol-1-yl)-hexyl]-1H-indole-2,3-dione(4e):**

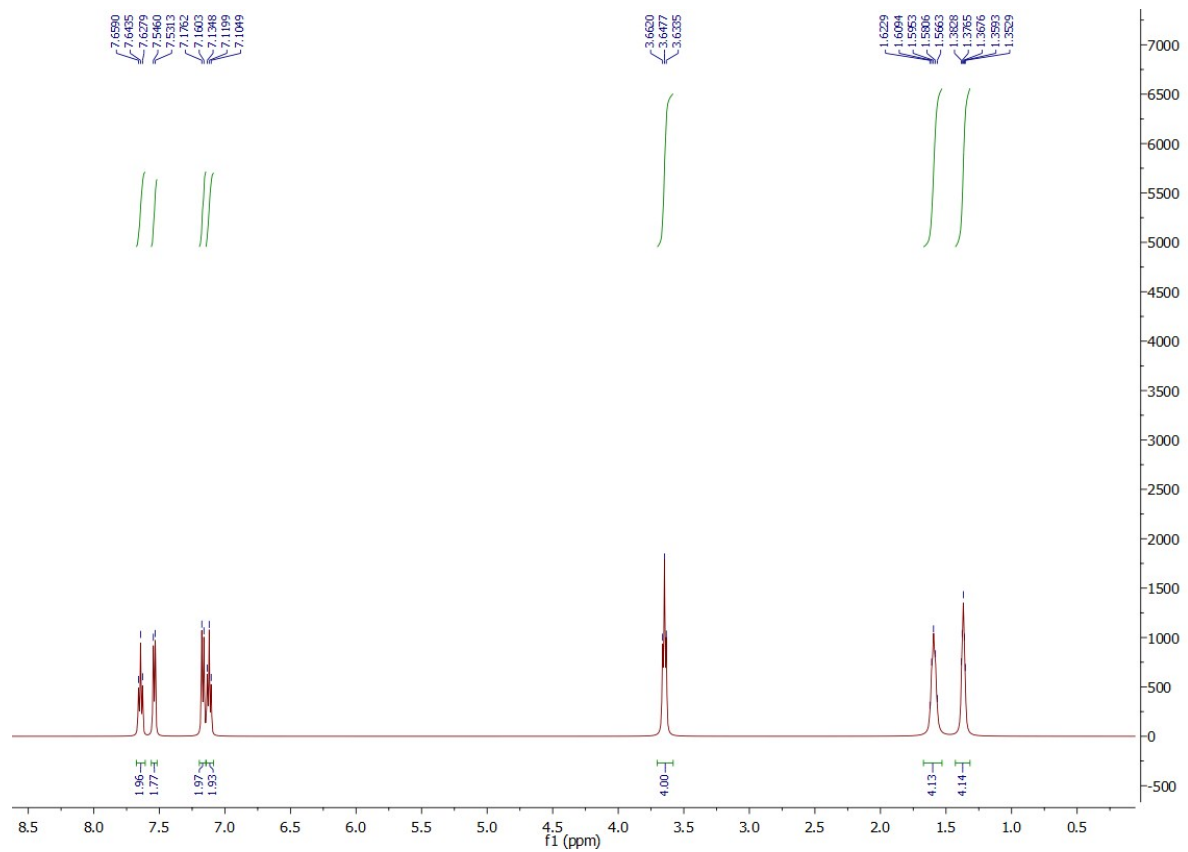

**<sup>13</sup>C NMR of 1-[6-(2,3-dioxo-2,3-dihydro-indol-1-yl)-hexyl]-1H-indole-2,3-dione(4e):**

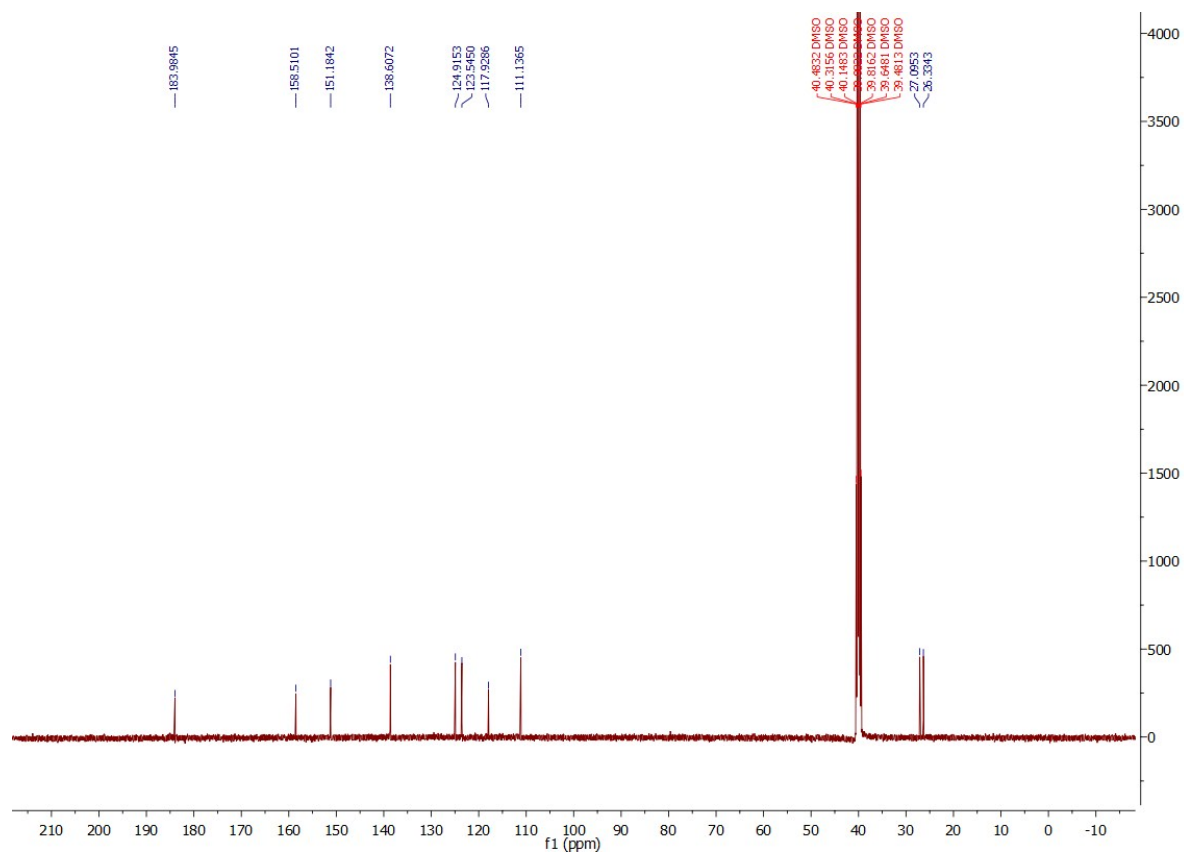

**<sup>1</sup>H NMR of 1-[8-(2,3-dioxo-2,3-dihydro-indol-1-yl)-octyl]-1H-indole-2,3-dione(4f):**

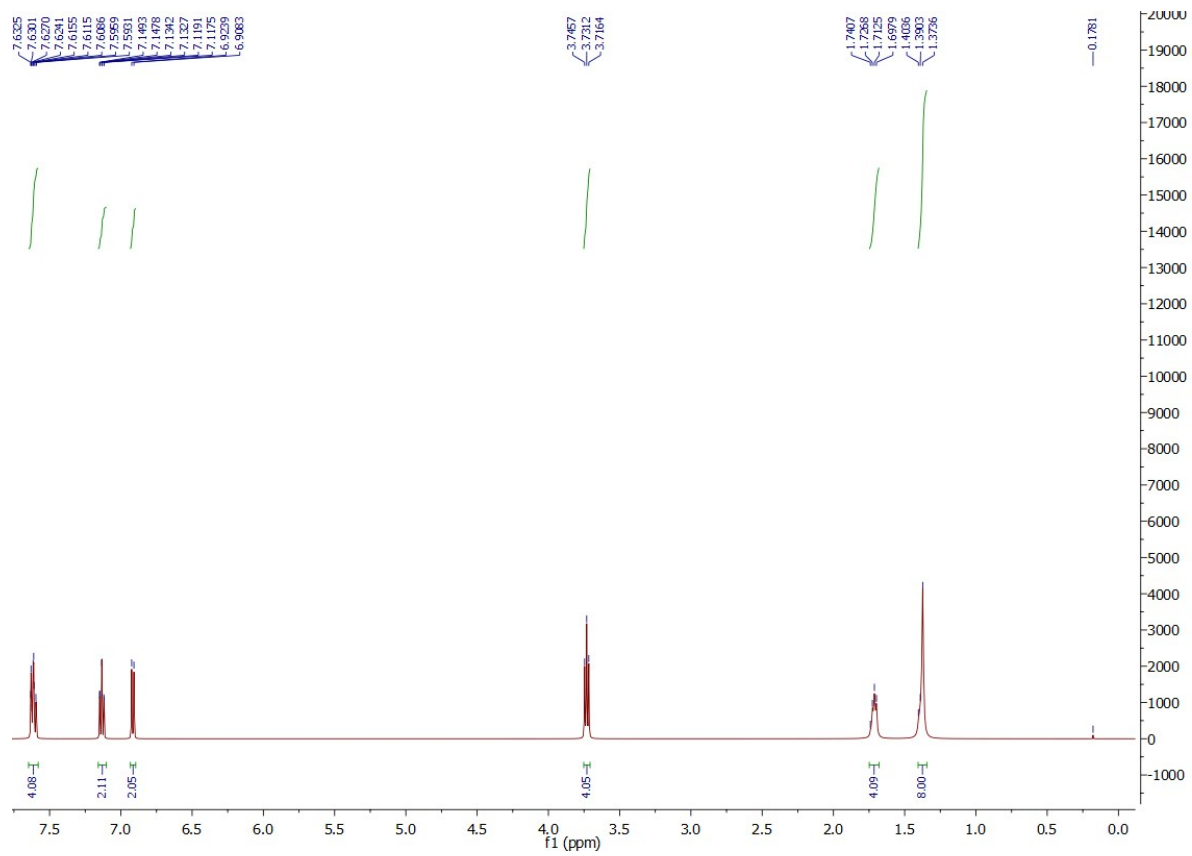

**<sup>13</sup>C NMR of 1-[8-(2,3-dioxo-2,3-dihydro-indol-1-yl)-octyl]-1H-indole-2,3-dione(4f):**

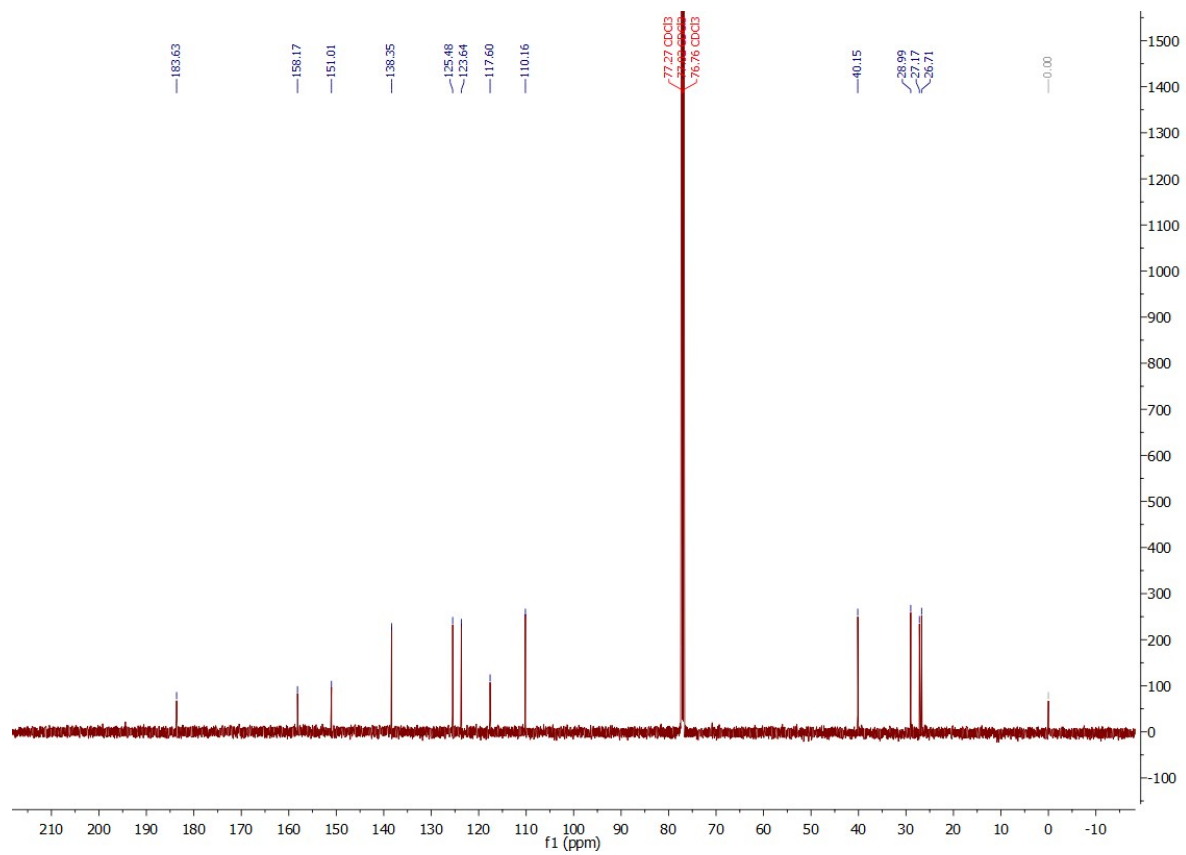

# <sup>1</sup>H NMR of 1-[2-(2,3-Dioxo-2,3-dihydro-indol-1-yl)-ethyl]-5-fluoro-1H-indole-2,3-dione(4m)

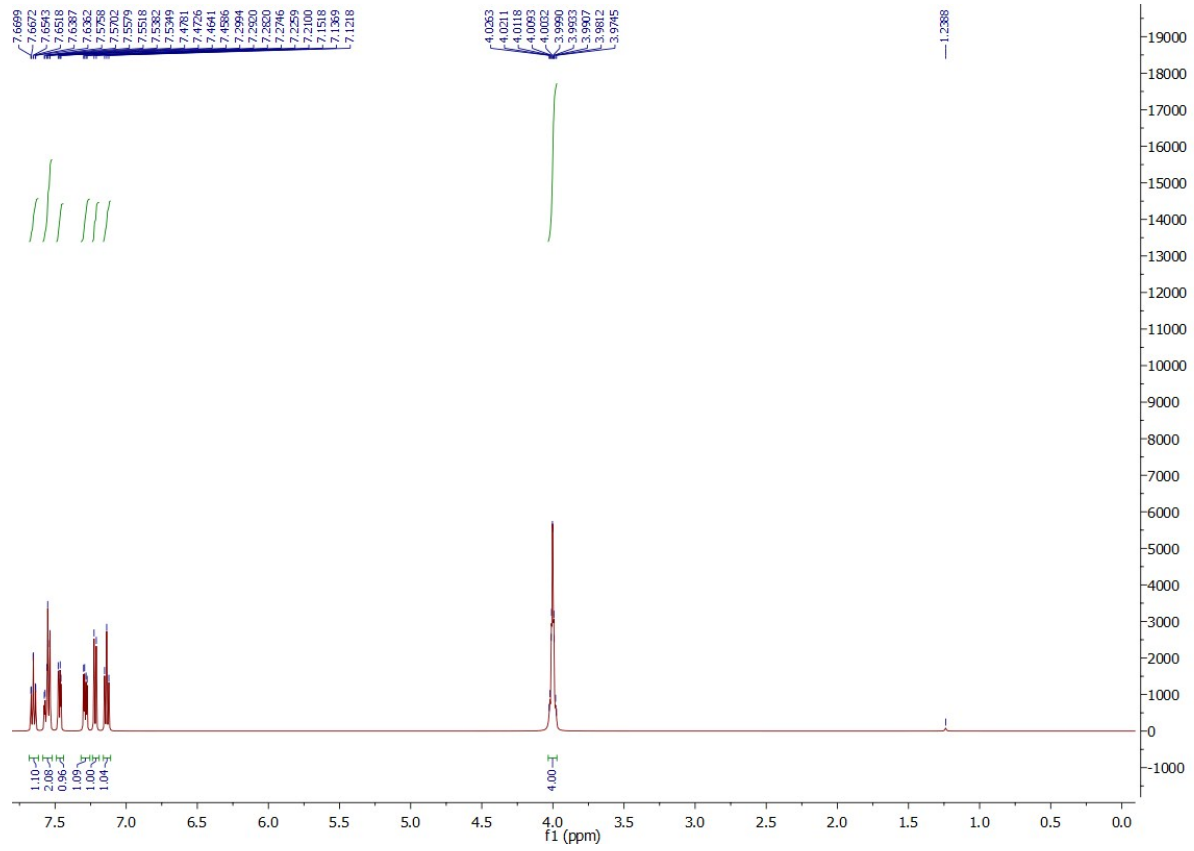

**<sup>13</sup>C NMR of 1-[2-(2,3-Dioxo-2,3-dihydro-indol-1-yl)-ethyl]-5-fluoro-1H-indole-2,3-dione(4m)**

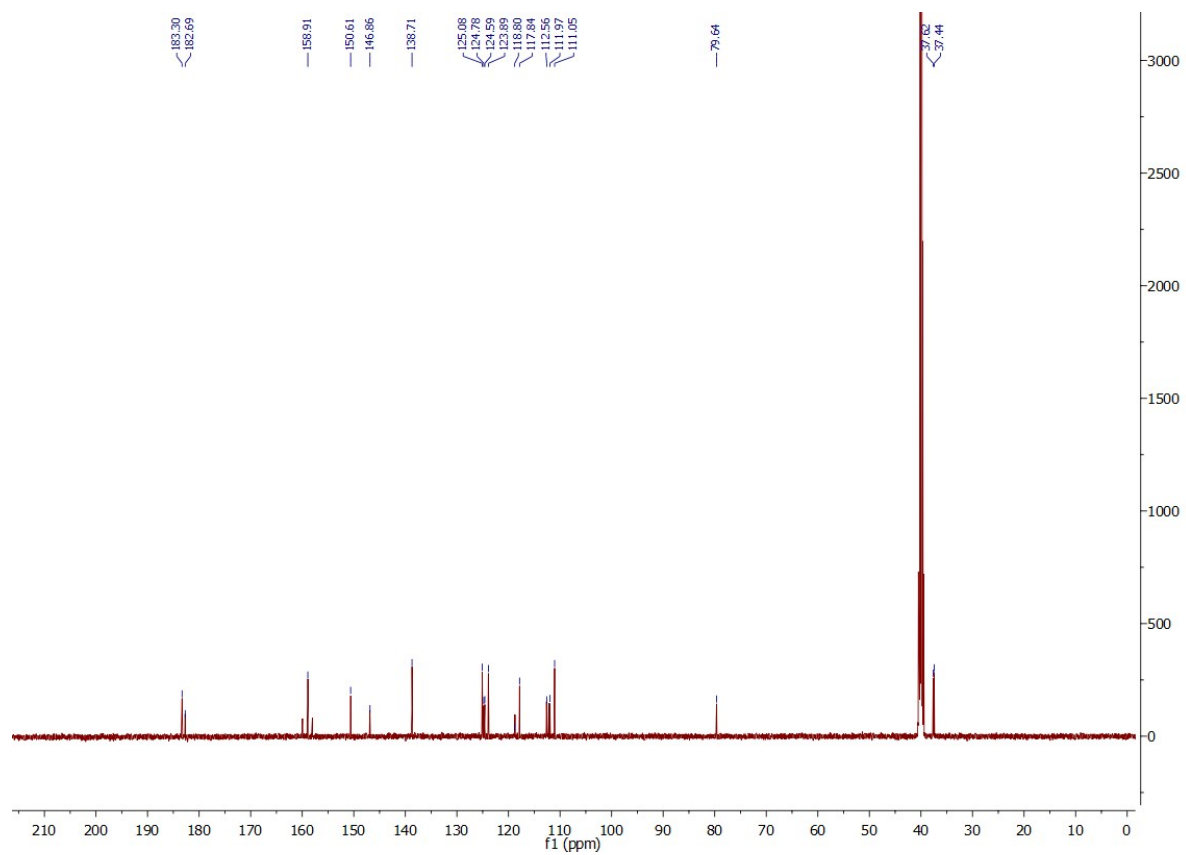



**<sup>1</sup>H NMR of 1-[3-(2,3-Dioxo-2,3-dihydro-indol-1-yl)-propyl]-5-fluoro-1H-indole-2,3-dione(4n):**

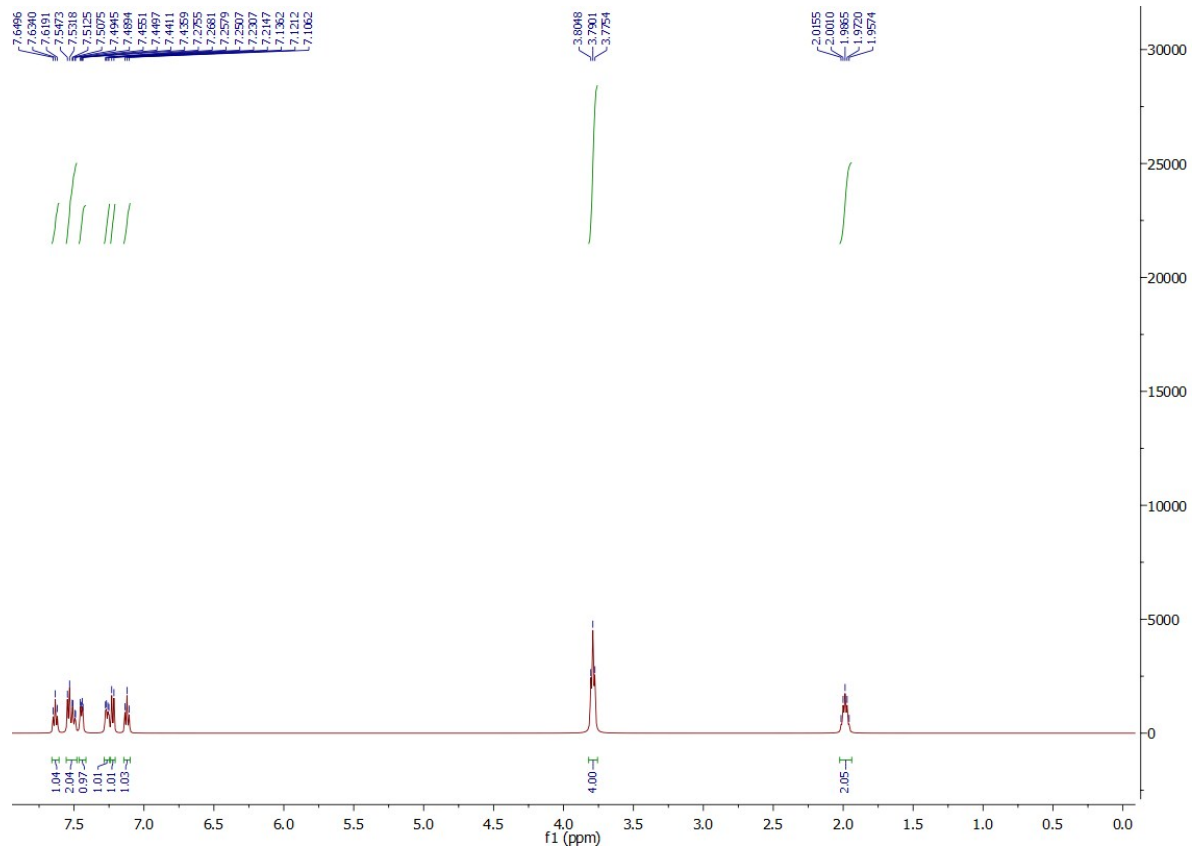

**<sup>13</sup>C of NMR 1-[3-(2,3-Dioxo-2,3-dihydro-indol-1-yl)-propyl]-5-fluoro-1H-indole-2,3-dione(4n):**

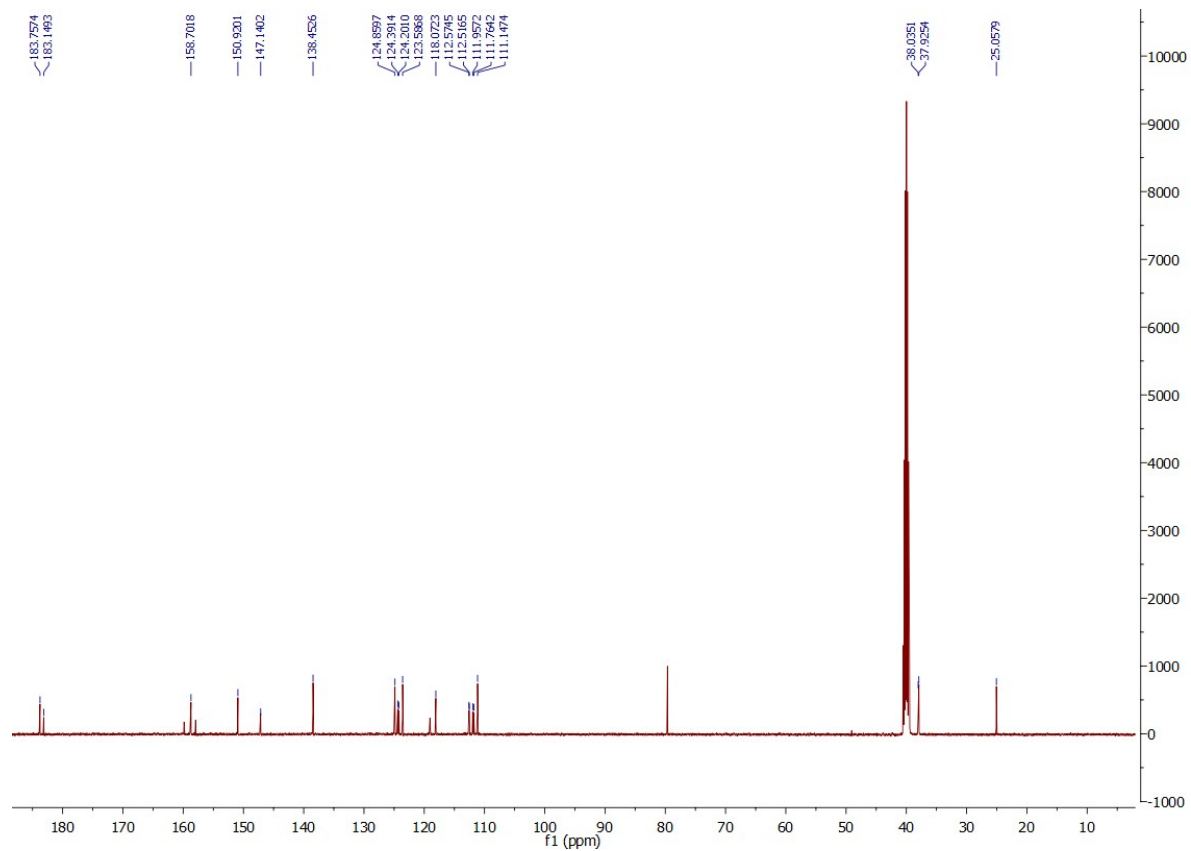

**<sup>1</sup>H NMR of 5-Bromo-1-[4-(2,3-dioxo-2,3-dihydro-indol-1-yl)-butyl]-1H-indole-2,3-dione(4u):**

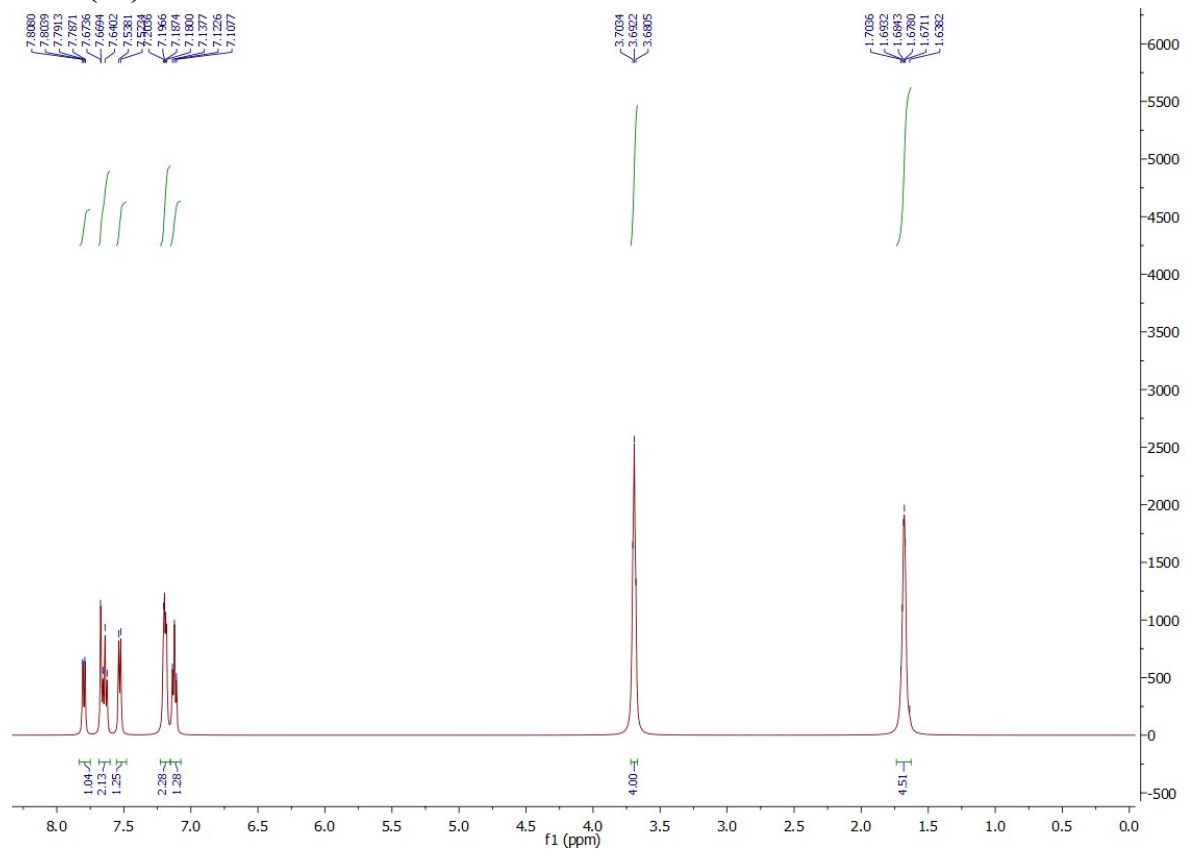

**<sup>13</sup>C NMR of NMR of 5-Bromo-1-[4-(2,3-dioxo-2,3-dihydro-indol-1-yl)-butyl]-1H-indole-2,3-dione(4u):**

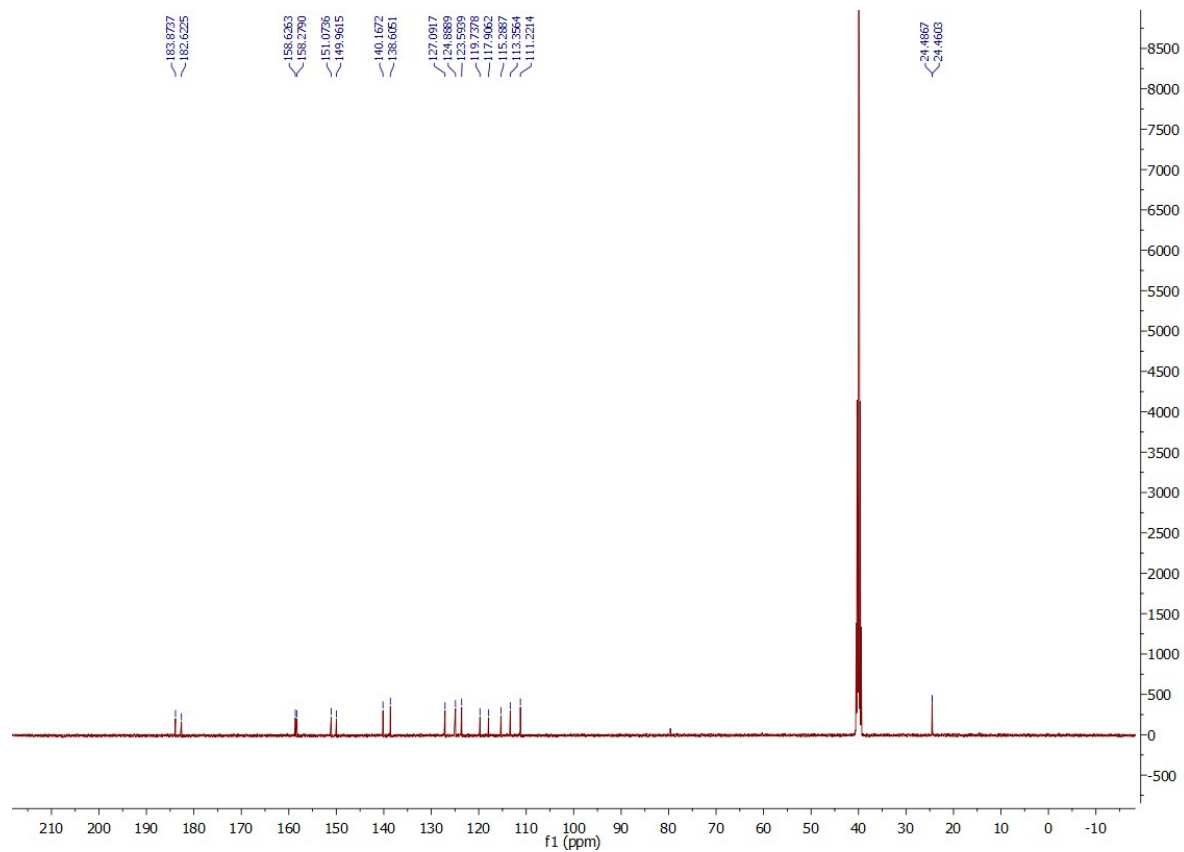

**<sup>1</sup>H of NMR5-Bromo-1-[5-(2,3-dioxo-2,3-dihydro-indol-1-yl)-pentyl]-1H-indole-2,3-dione**

**(4v):**

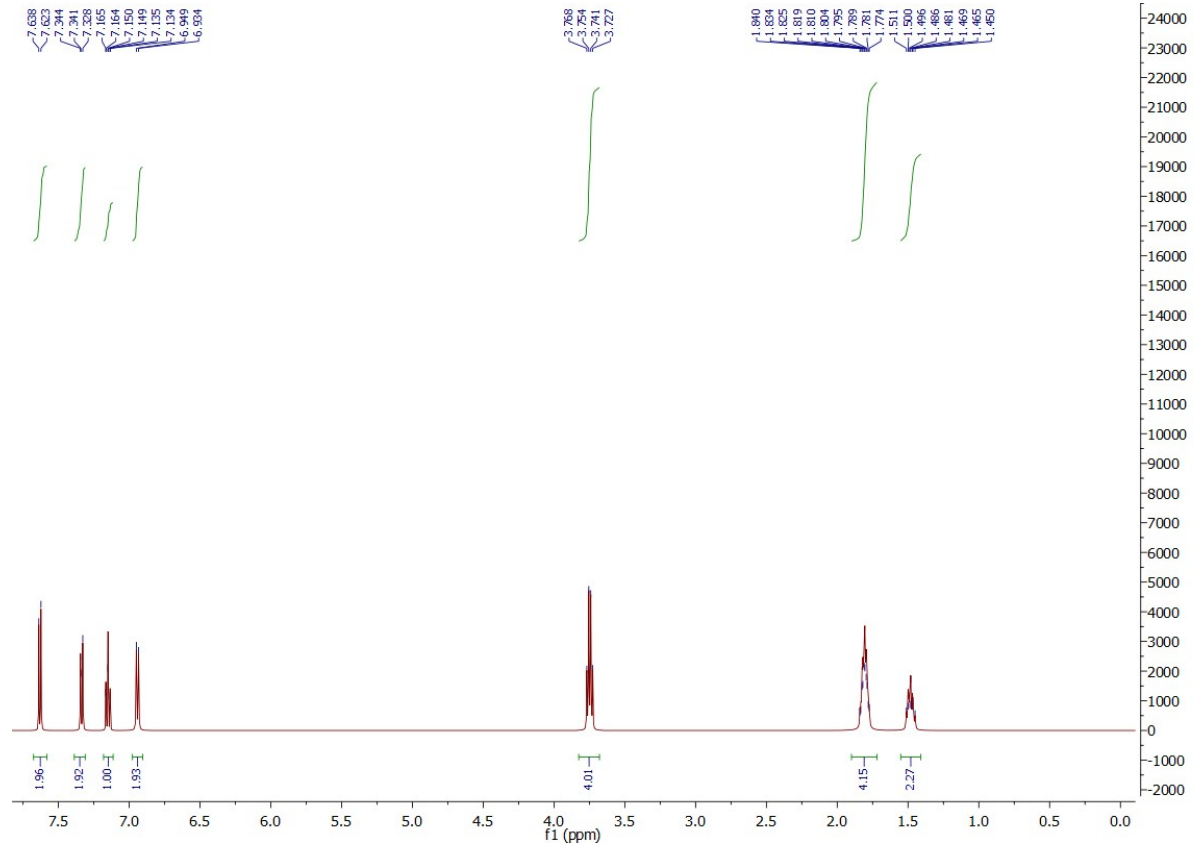

**<sup>13</sup>CNMR 5-Bromo-1-[5-(2,3-dioxo-2,3-dihydro-indol-1-yl)-pentyl]-1H-indole-2,3-dione (4v):**

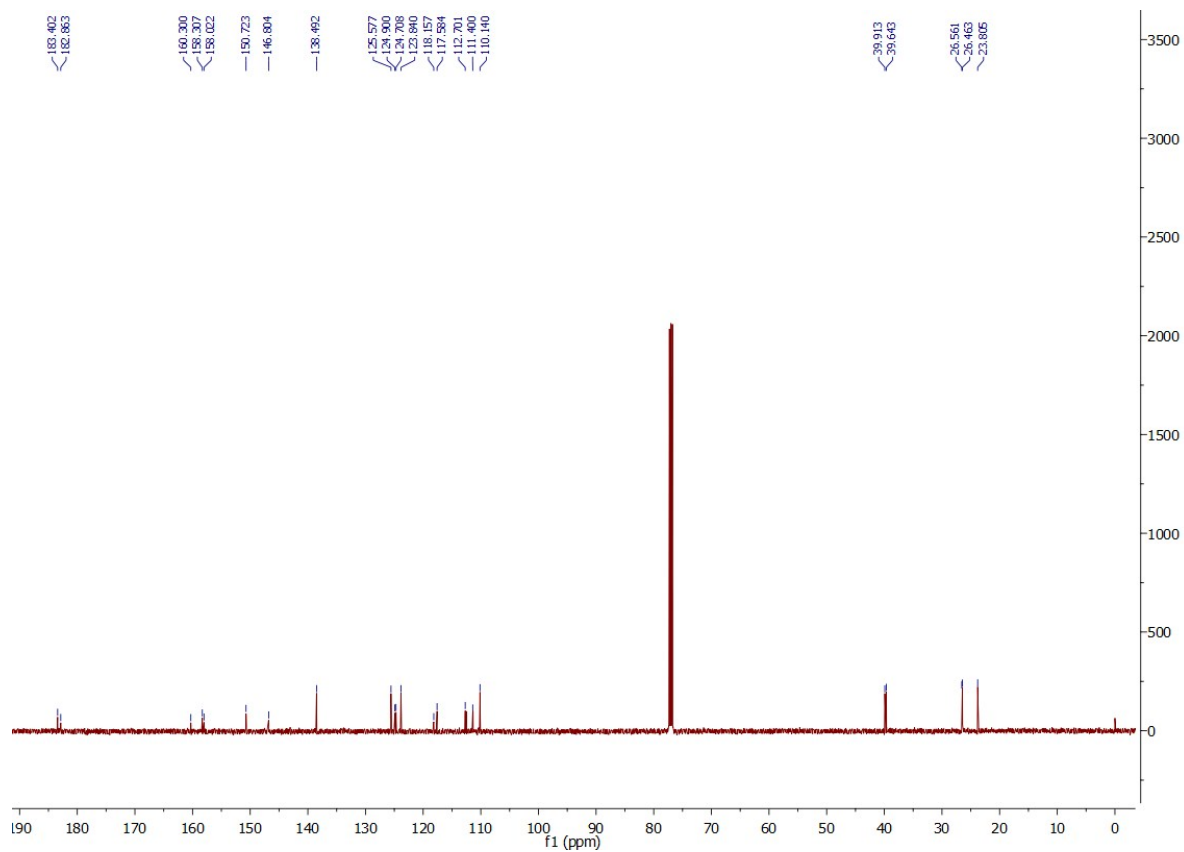

Supplement: MD-008-C7MD00434F-s001.pdf [file MD-008-C7MD00434F-s001.pdf]
